# Supplementary material for: Ammonia as an efficient catalyst for decomposition of carbonic acid: a quantum chemical investigation
Source: Royal Society of Chemistry journal article supplement (doi:10.1039/c6cp02407f), 2016-01-01
Supplement: c6cp02407f1.pdf [file c6cp02407f1.pdf]

## Electronic Supporting Information

for

### **Ammonia as an efficient catalyst for decomposition of carbonic acid: A quantum chemical investigation**

Biman Bandyopadhyay<sup>a</sup>, Partha Biswas<sup>b</sup> and Pradeep Kumar<sup>a</sup>

<sup>a</sup>*Department of Chemistry, Malaviya National Institute of Technology, J. L. N. Marg, Jaipur – 302017, India.*

<sup>b</sup>*Department of Chemistry, Scottish Church College, 1 & 3 Urquhart Square, Kolkata – 700006, India.*

## Table of contents

| S. No | Caption                                                                                                                                                                                                            | Page No. |
|-------|--------------------------------------------------------------------------------------------------------------------------------------------------------------------------------------------------------------------|----------|
| 1     | <b>Table S1</b> Relative energies (in kcal mol <sup>-1</sup> ) of all species with respect to the isolated reactants involved in decomposition of carbonic acid calculated at the three different levels of theory | 3        |
| 2     | <b>Table S2</b> Optimized geometries in Cartesian coordinates and normal mode frequencies of all species calculated at MP2/aug-cc-pVTZ level of theory                                                             | 4        |
| 3     | <b>Table S3</b> Absolute energies (in Hartree) of all species involved in isomerization of methoxy radical calculated at the three different levels of theory                                                      | 9        |

**Table S1** Relative energies (in kcal mol<sup>-1</sup>) of all species with respect to the isolated reactants involved in decomposition of carbonic acid calculated at the three different levels of theory. Here CA-X, TS<sub>x</sub> and CW-X stands for the pre-reactive complex, transition state and post-reactive complex of X-catalyzed reaction (X = WM and WD, AM, AD and FA)

| Catalyst | Species          | M06-2X/<br>aug-cc-pVTZ | MP2/<br>aug-cc-pVTZ | CCSD(T)/<br>aug-cc-pVTZ |
|----------|------------------|------------------------|---------------------|-------------------------|
| None     | CA               | 0.0                    | 0.0                 | 0.0                     |
|          | TS               | 44.9                   | 40.8                | 43.9                    |
|          | CW               | -3.7                   | -10.1               | -7.4                    |
| -----    |                  |                        |                     |                         |
| WM       | CA-WM            | -9.5                   | -9.3                | -9.3                    |
|          | TS <sub>WM</sub> | 15.8                   | 15.2                | 17.9                    |
|          | CW-WM            | -11.6                  | -17.7               | -15.1                   |
| -----    |                  |                        |                     |                         |
| WD       | CA-WD            | -13.7                  | -13.7               | -13.5                   |
|          | TS <sub>WD</sub> | 6.0                    | 6.6                 | 9.4                     |
|          | CW-WD            | -16.5                  | -22.1               | -19.4                   |
| -----    |                  |                        |                     |                         |
| AM       | CA-AM            | -12.2                  | -12.3               | -12.0                   |
|          | TS <sub>AM</sub> | 10.2                   | 7.7                 | 10.6                    |
|          | CW-AM            | -12.3                  | -18.8               | -16.0                   |
| -----    |                  |                        |                     |                         |
| AD       | CA-AD            | -18.7                  | -19.4               | -18.9                   |
|          | TS <sub>AD</sub> | -3.8                   | -4.5                | -2.0                    |
|          | CW-AD            | -19.3                  | -25.9               | -22.9                   |
| -----    |                  |                        |                     |                         |
| FA       | CA-FA            | -12.2                  | -12.6               | -12.6                   |
|          | TS <sub>FA</sub> | 4.1                    | 3.9                 | 6.1                     |
|          | CW-FA            | -14.3                  | -19.9               | -17.4                   |

**Table S2** Optimized geometries in Cartesian coordinates and normal mode frequencies of all species calculated at MP2/aug-cc-pVTZ level of theory

| Species          | Cartesian coordinate (Å)        | Vibrational frequencies (cm <sup>-1</sup> ) |
|------------------|---------------------------------|---------------------------------------------|
| CA               | C -0.060696 -0.133494 -0.000032 |                                             |
|                  | O -0.779495 -1.093599 0.000009  | 496.39 544.653 572.237                      |
|                  | O 1.276931 -0.194607 0.000008   | 605.857 790.357 967.833                     |
|                  | H 1.624839 0.706962 0.000007    | 1159.568 1270.334 1409.041                  |
|                  | O -0.474827 1.158895 0.000004   | 1879.919 3796.856 3804.288                  |
|                  | H -1.441538 1.128493 0.000022   |                                             |
| CW               | C 0.894344 0.003275 -0.000036   |                                             |
|                  | O 0.899596 1.173203 0.000114    | 4.168 97.016 111.372                        |
|                  | O 0.924155 -1.166187 -0.000052  | 150.911 165.096 648.601                     |
|                  | H -2.478377 -0.760632 0.001668  | 662.712 1328.626 1627.289                   |
|                  | O -1.878007 -0.009492 -0.000193 | 2404.378 3818.824 3944.670                  |
|                  | H -2.453637 0.760782 -0.000407  |                                             |
| TS               | C 0.348400 0.084792 -0.006743   |                                             |
|                  | O 1.360754 -0.514254 -0.000946  | -1684.612 397.487 501.476                   |
|                  | O -0.182545 1.233878 0.023464   | 626.211 723.315 789.505                     |
|                  | H -1.198507 0.536527 0.032401   | 940.464 1264.748 1302.201                   |
|                  | O -1.130663 -0.695968 -0.107208 | 1985.134 2190.221 3780.694                  |
|                  | H -1.272262 -1.234526 0.685580  |                                             |
| CA-WM            | C 0.897095 -0.072478 0.002330   |                                             |
|                  | O 2.097991 -0.126568 0.019310   | 77.2246 117.8669 184.6784                   |
|                  | O 0.081851 -1.113392 -0.009694  | 213.2577 294.7233 433.9362                  |
|                  | H -0.854308 -0.809426 -0.027224 | 556.8863 570.9267 628.0678                  |
|                  | O 0.198469 1.109400 -0.005222   | 790.9354 854.2377 958.3307                  |
|                  | H 0.877672 1.798099 -0.004558   | 1189.4082 1345.0185 1466.6503               |
|                  | H -3.079343 -0.156448 0.595981  | 1623.2309 1874.2634 3435.1441               |
|                  | H -2.075731 0.868397 0.047999   | 3789.2477 3793.4974 3918.3785               |
|                  | O -2.409668 -0.027659 -0.082667 |                                             |
| CW-WM            | C -1.354702 -0.465616 0.003664  |                                             |
|                  | O -2.275819 0.243184 -0.087294  | 32.6045 99.3577 102.8496                    |
|                  | O -0.462254 -1.221977 0.094274  | 123.5066 148.4672 181.0786                  |
|                  | H 1.652469 -1.038870 -0.045305  | 197.6712 217.6134 280.7546                  |
|                  | O 0.495865 1.579862 0.120828    | 482.9014 638.4357 645.3031                  |
|                  | H 0.632797 2.444502 -0.274183   | 661.1433 1331.5448 1628.3157                |
|                  | H 3.044127 -0.761895 0.519569   | 1648.5028 2408.9585 3685.7272               |
|                  | H 1.335481 1.107348 0.004885    | 3787.5944 3913.0525 3918.8378               |
|                  | O 2.425126 -0.470743 -0.156178  |                                             |
| TS <sub>WM</sub> | C 0.826834 -0.202595 -0.020493  |                                             |
|                  | O 1.986682 0.024672 0.171306    | -1101.2445 109.0828 369.3814                |
|                  | O 0.061049 -1.179895 -0.134735  | 429.6843 506.8299 547.6224                  |
|                  | H -1.275754 -0.751812 -0.049005 | 591.4968 640.3274 691.9895                  |
|                  | O -0.037714 1.114600 -0.192845  | 767.1696 785.5810 1057.6822                 |
|                  | H 0.440293 1.833169 0.240391    | 1187.5310 1343.5991 1409.8946               |
|                  | H -2.470630 -0.115912 0.901973  | 1602.8425 1802.4251 1999.2702               |
|                  | H -1.214871 0.776863 0.028843   | 2304.6912 3815.8149 3841.8385               |
|                  | O -2.065023 -0.025220 0.031370  |                                             |

|                  |   |           |           |           |           |           |           |
|------------------|---|-----------|-----------|-----------|-----------|-----------|-----------|
| CA-WD            | C | 1.418115  | -0.025101 | -0.013876 |           |           |           |
|                  | O | 2.587680  | -0.299661 | -0.075719 | 25.7033   | 81.9801   | 120.8444  |
|                  | O | 0.890580  | 1.155780  | -0.241517 | 150.0192  | 217.0661  | 220.6850  |
|                  | H | -0.090812 | 1.185997  | -0.080857 | 258.8435  | 294.0054  | 300.8475  |
|                  | O | 0.463829  | -0.968910 | 0.316025  | 432.8798  | 536.2812  | 561.1737  |
|                  | H | 0.978851  | -1.767911 | 0.500173  | 612.6177  | 633.8700  | 789.5171  |
|                  | H | -2.025534 | 1.878717  | 0.891808  | 830.3265  | 947.1864  | 984.0237  |
|                  | H | -2.181062 | 0.590299  | 0.043657  | 1208.2882 | 1348.8029 | 1434.8871 |
|                  | H | -1.405953 | -1.321759 | -0.091777 | 1629.3514 | 1652.8300 | 1872.9531 |
|                  | H | -2.661800 | -1.597456 | -0.936914 | 3229.6173 | 3555.2837 | 3715.2530 |
|                  | O | -1.716371 | 1.449187  | 0.089231  | 3778.2743 | 3893.9150 | 3901.4827 |
|                  | O | -2.366014 | -1.188557 | -0.118375 |           |           |           |
| CW-WD            | C | -1.956598 | 0.204981  | -0.267200 |           |           |           |
|                  | O | -2.637770 | -0.733803 | -0.128127 | 11.7840   | 29.9614   | 78.0064   |
|                  | O | -1.302694 | 1.164954  | -0.418872 | 82.6306   | 100.8991  | 171.9167  |
|                  | H | 1.018235  | 2.022339  | 0.142117  | 189.7089  | 199.8796  | 222.7317  |
|                  | O | 0.317317  | -1.050326 | 0.936817  | 226.4127  | 274.7306  | 323.9979  |
|                  | H | 0.230963  | -1.801780 | 1.529374  | 388.6173  | 474.7628  | 603.0356  |
|                  | H | 1.075263  | 0.762362  | 0.988626  | 643.7374  | 649.6029  | 663.3766  |
|                  | H | 2.319487  | 0.100811  | -0.566645 | 870.4335  | 1329.7097 | 1640.0060 |
|                  | H | 1.015382  | -1.292513 | 0.299479  | 1648.3376 | 1670.9791 | 2406.4572 |
|                  | H | 3.258445  | -1.053468 | -0.976079 | 3553.6631 | 3613.4894 | 3694.0579 |
|                  | O | 2.331543  | -0.804217 | -0.933607 | 3885.1085 | 3901.4793 | 3902.7252 |
|                  | O | 1.644331  | 1.427437  | 0.567079  |           |           |           |
| TS <sub>WD</sub> | C | -1.322973 | -0.214637 | -0.026772 |           |           |           |
|                  | O | -2.490865 | -0.053486 | 0.235706  | -602.6739 | 40.4332   | 59.5854   |
|                  | O | -0.555482 | -1.173196 | -0.213682 | 123.0983  | 366.5743  | 396.6156  |
|                  | H | 0.917330  | -1.260842 | -0.111070 | 409.5121  | 478.4765  | 510.8520  |
|                  | O | -0.577251 | 1.118773  | -0.194451 | 548.9359  | 564.1045  | 584.7943  |
|                  | H | -1.211154 | 1.788661  | 0.094697  | 696.2055  | 744.0625  | 777.3313  |
|                  | H | 2.188038  | -1.690126 | 0.767955  | 998.7670  | 1060.4564 | 1120.4571 |
|                  | H | 2.007728  | 0.124666  | 0.123871  | 1315.8492 | 1390.4042 | 1504.0335 |
|                  | H | 0.724997  | 1.254030  | 0.019007  | 1621.1677 | 1721.0448 | 1781.9006 |
|                  | H | 2.242394  | 1.640017  | -0.590508 | 1912.6723 | 1946.6823 | 2678.1400 |
|                  | O | 1.816794  | 1.218309  | 0.165605  | 3797.8525 | 3841.6421 | 3866.7790 |
|                  | O | 1.940367  | -1.181472 | -0.011092 |           |           |           |
| CA-AM            | C | 0.000000  | 0.932890  | 0.000000  |           |           |           |
|                  | O | 0.042728  | 2.137673  | 0.000000  | 50.884    | 77.949    | 102.101   |
|                  | O | 1.042330  | 0.126809  | 0.000000  | 241.7131  | 299.5776  | 377.2078  |
|                  | H | 0.751783  | -0.833964 | 0.000000  | 568.4981  | 572.5081  | 634.8974  |
|                  | O | -1.178967 | 0.230547  | 0.000000  | 798.93    | 963.307   | 1058.656  |
|                  | H | -1.866071 | 0.911163  | 0.000000  | 1122.743  | 1194.641  | 1360.140  |
|                  | N | 0.235767  | -2.464579 | 0.000000  | 1499.472  | 1665.855  | 1670.321  |
|                  | H | 0.494179  | -3.005375 | 0.815904  | 1860.181  | 3053.060  | 3498.978  |
|                  | H | 0.494179  | -3.005375 | -0.815904 | 3642.161  | 3646.36   | 3793.994  |
|                  | H | -0.773164 | -2.371966 | 0.000000  |           |           |           |
| CW-AM            | C | -1.428414 | -0.461571 | 0.000020  |           |           |           |
|                  | O | -2.347598 | 0.257659  | 0.005305  | 29.6956   | 84.4920   | 90.0713   |
|                  | O | -0.539282 | -1.225693 | -0.005148 | 104.6744  | 120.0685  | 130.1069  |
|                  | H | 1.850320  | -1.127834 | 0.004590  | 205.5288  | 219.3456  | 253.7383  |
|                  | O | 0.450428  | 1.516319  | -0.006018 | 512.4337  | 643.2068  | 662.1362  |
|                  | H | 0.690032  | 2.445926  | 0.012775  | 756.0715  | 1098.058  | 1330.487  |
|                  | N | 2.562453  | -0.405934 | 0.003598  | 1644.765  | 1674.348  | 1679.667  |
|                  | H | 3.142805  | -0.559357 | -0.811483 | 2406.495  | 3493.030  | 3530.013  |
|                  | H | 3.145367  | -0.559473 | 0.816813  | 3635.474  | 3647.592  | 3906.964  |
|                  | H | 1.296411  | 1.025424  | -0.001099 |           |           |           |

|                  |   |           |           |           |          |          |          |
|------------------|---|-----------|-----------|-----------|----------|----------|----------|
| TS <sub>AM</sub> | C | 0.909348  | -0.227252 | -0.025889 |          |          |          |
|                  | O | 2.036271  | 0.108305  | 0.227857  | -614.091 | 78.7365  | 234.4123 |
|                  | O | 0.203548  | -1.218484 | -0.179407 | 267.7703 | 373.9783 | 424.8637 |
|                  | H | -1.584444 | -0.882721 | 0.015534  | 432.1462 | 539.4310 | 610.0797 |
|                  | O | -0.042424 | 1.102730  | -0.243949 | 707.9513 | 757.6924 | 914.0791 |
|                  | H | 0.454224  | 1.833308  | 0.145187  | 1059.377 | 1279.305 | 1378.643 |
|                  | N | -2.165191 | -0.036342 | 0.148869  | 1571.522 | 1605.748 | 1699.753 |
|                  | H | -2.620676 | -0.047858 | 1.052269  | 1841.963 | 2000.875 | 3244.595 |
|                  | H | -2.852283 | 0.054021  | -0.588586 | 3570.111 | 3654.266 | 3816.085 |
|                  | H | -1.275737 | 0.720749  | 0.052834  |          |          |          |
| CA-AD            | C | -1.421406 | -0.066824 | -0.033150 |          |          |          |
|                  | O | -2.541033 | -0.476912 | -0.219494 | 24.4868  | 74.0686  | 99.1858  |
|                  | O | -0.913596 | 1.043092  | -0.510494 | 109.9298 | 139.8731 | 164.2814 |
|                  | H | 0.036100  | 1.215181  | -0.178369 | 190.5739 | 244.9819 | 270.6929 |
|                  | O | -0.509270 | -0.759769 | 0.735566  | 334.3417 | 392.8406 | 535.2545 |
|                  | H | -1.010115 | -1.521841 | 1.059377  | 569.7160 | 591.6747 | 643.8864 |
|                  | N | 1.567830  | 1.584030  | 0.268110  | 799.9383 | 953.9550 | 1092.807 |
|                  | H | 1.642030  | 1.784015  | 1.258084  | 1144.330 | 1190.245 | 1201.535 |
|                  | H | 1.972331  | 2.369468  | -0.226712 | 1364.674 | 1510.731 | 1656.179 |
|                  | H | 2.135788  | 0.756600  | 0.074633  | 1671.083 | 1681.347 | 1700.875 |
|                  | N | 2.479420  | -1.266341 | -0.355755 | 1856.211 | 2748.002 | 3393.325 |
|                  | H | 1.517596  | -1.426669 | -0.073563 | 3484.145 | 3576.605 | 3622.137 |
|                  | H | 3.060079  | -1.900220 | 0.179152  | 3641.407 | 3642.474 | 3785.156 |
|                  | H | 2.555076  | -1.550706 | -1.324818 |          |          |          |
| CW-AD            | C | -1.767654 | 0.226591  | -0.390186 |          |          |          |
|                  | O | -2.689588 | -0.161195 | 0.213782  | 23.6668  | 29.7038  | 71.9535  |
|                  | O | -0.874405 | 0.637493  | -1.027967 | 88.5027  | 107.6367 | 127.9603 |
|                  | H | 1.121995  | 2.147882  | -0.076733 | 144.6423 | 163.2405 | 174.7847 |
|                  | O | 0.125833  | -0.927075 | 1.268145  | 216.3126 | 241.6950 | 246.1339 |
|                  | H | -0.000831 | -1.678463 | 1.853228  | 311.0812 | 345.3892 | 416.4948 |
|                  | N | 1.777416  | 1.602590  | 0.469825  | 581.3941 | 639.9217 | 663.8051 |
|                  | H | 1.220467  | 1.025303  | 1.093824  | 852.0325 | 1098.009 | 1138.489 |
|                  | H | 2.300910  | 2.253846  | 1.041148  | 1327.665 | 1644.303 | 1657.245 |
|                  | H | 2.209368  | -0.220824 | -0.632608 | 1680.775 | 1684.866 | 1694.072 |
|                  | N | 1.959540  | -1.190869 | -0.828625 | 2402.401 | 3380.706 | 3427.594 |
|                  | H | 0.765885  | -1.227359 | 0.581895  | 3476.847 | 3585.752 | 3612.309 |
|                  | H | 2.815674  | -1.726016 | -0.899559 | 3645.384 | 3645.686 | 3897.252 |
|                  | H | 1.519048  | -1.209743 | -1.740162 |          |          |          |
| TS <sub>AD</sub> | C | 1.280104  | -0.163849 | -0.108649 |          |          |          |
|                  | O | 2.501627  | -0.180388 | -0.130939 | -891.688 | 39.3660  | 53.1655  |
|                  | O | 0.388576  | -0.781770 | -0.744390 | 103.9378 | 227.0484 | 267.6999 |
|                  | H | -0.993175 | -1.258799 | 0.070442  | 304.3318 | 315.5491 | 416.9752 |
|                  | O | 0.687600  | 0.776589  | 0.844502  | 482.7888 | 551.9605 | 576.6371 |
|                  | H | 1.459889  | 1.185897  | 1.257378  | 615.8916 | 635.0976 | 688.8294 |
|                  | N | -1.967152 | -1.121773 | 0.438565  | 771.9404 | 812.2707 | 823.2697 |
|                  | H | -1.963352 | -1.221386 | 1.446076  | 1169.809 | 1253.371 | 1292.099 |
|                  | H | -2.597557 | -1.806800 | 0.042075  | 1328.802 | 1561.932 | 1579.438 |
|                  | H | -2.031346 | 0.129906  | -0.000261 | 1676.230 | 1705.590 | 1758.211 |
|                  | N | -1.690152 | 1.247124  | -0.461198 | 1787.333 | 1831.371 | 2965.067 |
|                  | H | -0.800928 | 1.410192  | 0.038507  | 3242.188 | 3544.896 | 3556.150 |
|                  | H | -2.325464 | 2.027942  | -0.357772 | 3638.846 | 3649.350 | 3791.628 |
|                  | H | -1.449984 | 1.123233  | -1.439503 |          |          |          |

|                  |           |           |           |           |           |           |           |
|------------------|-----------|-----------|-----------|-----------|-----------|-----------|-----------|
| CA-FA            | C         | 1.650339  | -0.039414 | 0.000011  | 34.2422   | 78.0045   | 158.3823  |
|                  | O         | 2.837783  | 0.133909  | 0.000001  |           |           |           |
|                  | O         | 1.033094  | -1.199755 | -0.000109 |           |           |           |
|                  | H         | 0.049782  | -1.101657 | -0.000038 |           |           |           |
|                  | O         | 0.756377  | 1.019870  | 0.000098  |           |           |           |
|                  | H         | 1.312444  | 1.812561  | 0.000165  |           |           |           |
|                  | C         | -2.398640 | -0.155261 | 0.000023  |           |           |           |
|                  | H         | -3.485431 | -0.245791 | 0.000182  |           |           |           |
|                  | O         | -1.653008 | -1.118721 | 0.000092  |           |           |           |
|                  | O         | -2.018299 | 1.111545  | -0.000121 |           |           |           |
| H                | -1.034566 | 1.128152  | -0.000196 |           |           |           |           |
| CW-FA            | C         | 2.070470  | -0.556747 | -0.000022 | 23.3688   | 30.2958   | 48.4185   |
|                  | O         | 3.096051  | -0.004942 | -0.000012 |           |           |           |
|                  | O         | 1.068825  | -1.168628 | -0.000036 |           |           |           |
|                  | H         | -0.868032 | -1.046197 | 0.000098  |           |           |           |
|                  | O         | 0.628488  | 1.678208  | 0.000049  |           |           |           |
|                  | H         | 0.797373  | 2.623692  | 0.000142  |           |           |           |
|                  | C         | -2.545403 | -0.165236 | -0.000018 |           |           |           |
|                  | H         | -3.609483 | -0.410216 | -0.000059 |           |           |           |
|                  | O         | -1.816300 | -1.277528 | 0.000080  |           |           |           |
|                  | O         | -2.118576 | 0.969787  | -0.000074 |           |           |           |
| H                | -0.338168 | 1.589442  | 0.000011  |           |           |           |           |
| TS <sub>FA</sub> | C         | -1.522536 | -0.211338 | -0.013146 | -922.953  | 65.5086   | 79.0000   |
|                  | O         | -2.670520 | 0.024502  | -0.254747 |           |           |           |
|                  | O         | -0.760898 | -1.194128 | 0.035242  |           |           |           |
|                  | H         | 0.564560  | -1.096670 | 0.122803  |           |           |           |
|                  | O         | -0.716527 | 1.071860  | 0.384578  |           |           |           |
|                  | H         | -1.262437 | 1.827355  | 0.123633  |           |           |           |
|                  | C         | 2.197104  | 0.020164  | -0.098310 |           |           |           |
|                  | H         | 3.281608  | 0.015401  | -0.191776 |           |           |           |
|                  | O         | 1.661952  | -1.111849 | 0.123763  |           |           |           |
|                  | O         | 1.605671  | 1.121442  | -0.217602 |           |           |           |
| H                | 0.411437  | 1.106345  | 0.044199  |           |           |           |           |
| WM               | O         | 0.000000  | 0.000000  | 0.118189  | 1627.7612 | 3824.7050 | 3950.6090 |
|                  | H         | 0.000000  | 0.758025  | -0.472754 |           |           |           |
|                  | H         | 0.000000  | -0.758025 | -0.472754 |           |           |           |
| WD               | O         | -1.385097 | 0.000601  | 0.110496  | 127.0098  | 147.1099  | 154.9316  |
|                  | H         | -1.746597 | -0.763119 | -0.349950 |           |           |           |
|                  | H         | -1.747854 | 0.758911  | -0.357831 |           |           |           |
|                  | O         | 1.512857  | -0.000695 | -0.121976 |           |           |           |
|                  | H         | 0.559405  | 0.000611  | 0.048517  |           |           |           |
|                  | H         | 1.912972  | 0.004353  | 0.751104  |           |           |           |
| AM               | N         | -0.000001 | 0.000024  | -0.113458 | 1031.0862 | 1668.1686 | 1668.278  |
|                  | H         | -0.813306 | 0.468039  | 0.264760  |           |           |           |
|                  | H         | 0.812092  | 0.470150  | 0.264756  |           |           |           |
|                  | H         | 0.001222  | -0.938358 | 0.264690  |           |           |           |
| AD               | N         | -1.566861 | -0.000104 | -0.049447 | 49.2407   | 61.3644   | 109.2828  |
|                  | H         | -1.370764 | 0.000065  | 0.944511  |           |           |           |
|                  | H         | -2.143019 | -0.811868 | -0.234205 |           |           |           |
|                  | H         | -2.141135 | 0.812853  | -0.234957 |           |           |           |
|                  | N         | 1.665929  | -0.000114 | 0.100349  |           |           |           |
|                  | H         | 2.126024  | -0.810612 | -0.294555 |           |           |           |
|                  | H         | 0.709620  | -0.000019 | -0.243743 |           |           |           |
| H                | 2.125797  | 0.811106  | -0.293365 |           |           |           |           |

|    |   |           |           |          |          |          |          |
|----|---|-----------|-----------|----------|----------|----------|----------|
| FA | C | 0.000000  | 0.422392  | 0.000000 |          |          |          |
|    | H | -0.376774 | 1.447695  | 0.000000 | 625.952  | 674.778  | 1058.557 |
|    | O | 1.163418  | 0.108154  | 0.000000 | 1130.131 | 1301.324 | 1408.906 |
|    | O | -1.034994 | -0.439528 | 0.000000 | 1794.039 | 3125.306 | 3741.349 |
|    | H | -0.650614 | -1.331055 | 0.000000 |          |          |          |



**Table S3** Absolute energies (in Hartree) of all species involved in decomposition of carboxylic acid calculated at the three different levels of theory. Here CA-X, TS<sub>x</sub> and CW-X stands for the pre-reactive complex, transition state and post-reactive complex of X-catalyzed reaction (X = WM and WD, AM, AD and FA)

| Catalyst | Species          | M06-2X/<br>aug-cc-pVTZ | MP2/<br>aug-cc-pVTZ | CCSD(T)/<br>aug-cc-pVTZ |
|----------|------------------|------------------------|---------------------|-------------------------|
| None     | CA               | -265.02377660          | -264.63907576       | -264.6759148            |
|          | TS               | -264.95220347          | -264.57406173       | -264.6060256            |
|          | CW               | -265.02961886          | -264.6551204        | -264.6876492            |
| WM       | CA-WM            | -341.4690336           | -340.9828534        | -341.0329751            |
|          | TS <sub>WM</sub> | -341.4287493           | -340.9439045        | -341.0422798            |
|          | CW-WM            | -341.4723741           | -340.9962466        | -340.9897759            |
| WD       | CA-WD            | -417.9140456           | -417.3271415        | -417.390438             |
|          | TS <sub>WD</sub> | -417.8826278           | -417.2947286        | -417.3998065            |
|          | CW-WD            | -417.9185268           | -417.3404721        | -417.3539439            |
| AM       | CA-AM            | -321.59616703          | -321.11927572       | -321.1755954            |
|          | TS <sub>AM</sub> | -321.56050389          | -321.08737878       | -321.1395183            |
|          | CW-AM            | -321.59637830          | -321.12964709       | -321.1820193            |
| AD       | CA-AD            | -378.15944730          | -377.59104371       | -377.6670727            |
|          | TS <sub>AD</sub> | -378.13571087          | -377.56733222       | -377.6401674            |
|          | CW-AD            | -378.16045247          | -377.60140657       | -377.673548             |
| FA       | CA-FA            | -454.8128131           | -454.1458856        | -454.2137132            |
|          | TS <sub>FA</sub> | -454.7868756           | -454.1195708        | -454.1840052            |
|          | CW-FA            | -454.8161326           | -454.1574632        | -454.2213483            |

---

---

---
